# Supplementary material for: The Role of Unmanned Aerial Vehicles (UAVs) In Monitoring Rapidly Occuring Landslides
Source: Copernicus journal article supplement (doi:10.5194/nhess-2018-13), 2018-01-23
Supplement: Supplementary file [file nhess-2018-13-AC5-supplement.pdf]

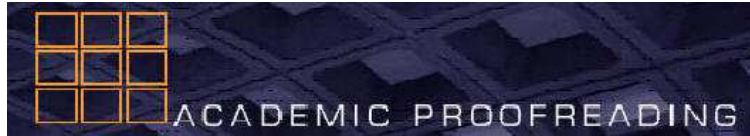

This is to certify that the following document has been proofread in terms of the quality of the English used:

The Role of Unmanned Aerial Vehicles (UAVs)  
In Monitoring Rapidly Occurring Landslides

The document was submitted for proofreading by Omer Yildirim.

The proofreader was Dr Hazel Bird on behalf of Academic Proofreading.

If you have any questions, please do not hesitate to ask. We can be contacted at [prime@academicproofreading.com](mailto:prime@academicproofreading.com)

Academic Proofreading  
Hurworth House  
17 Beechwood Terrace  
Sunderland  
SR2 7LY  
United Kingdom

Dr. David Mercer  
16<sup>th</sup> March, 2018
